# Supplementary material for: CO2-modified solvents for chromatographic separation
Source: Royal Society of Chemistry journal article supplement (doi:10.1039/c6gc03405e), 2017-01-01
Supplement: c6gc03405e1.pdf [file c6gc03405e1.pdf]

## Supporting Information

### CO<sub>2</sub> Modified Solvents for Chromatographic Separation

Xilong Yuan,<sup>a</sup> Eun Gi Kim,<sup>a</sup> Connor A. Sanders,<sup>a</sup> Bruce E. Richter,<sup>b</sup> Michael F. Cunningham,<sup>c</sup> Philip G. Jessop,<sup>a</sup> and Richard D. Oleschuk<sup>\*a</sup>

<sup>a</sup> Department of Chemistry, Queen's University, 90 Bader Lane, Kingston, ON, Canada K7L 3N6

<sup>b</sup> Agilent Technologies, 2850 Centerville Road, Wilmington, DE 19808, USA

<sup>c</sup> Department of Chemical Engineering, Queen's University, 19 Division Street, Kingston, ON, Canada K7L 3N6

Table S-1. Analytes structure,  $\log P$  and  $pK_a$  values\*.

| Number | Analyte                     | Structure                                                                            | $\log P$ | $pK_a$ ( $pK_{aH}$ ) |
|--------|-----------------------------|--------------------------------------------------------------------------------------|----------|----------------------|
| 1      | Naphthalene                 | 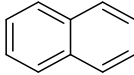    | 3.0      | -                    |
| 2      | 3- <i>tert</i> -Butylphenol |    | 3.2      | 10.1                 |
| 3      | 3-Phenyl phenol             |    | 3.3      | 9.8                  |
| 4      | 4-Butylaniline              |    | 3.0      | 4.9                  |
| 5      | Diphenylamine               |   | 3.4      | 0.8                  |
| 6      | Anthracene                  |  | 4.0      | -                    |

\*Chemicalize.org (ChemAxon®) used for prediction of  $\log P$  and  $pK_a$  values, June 2016.

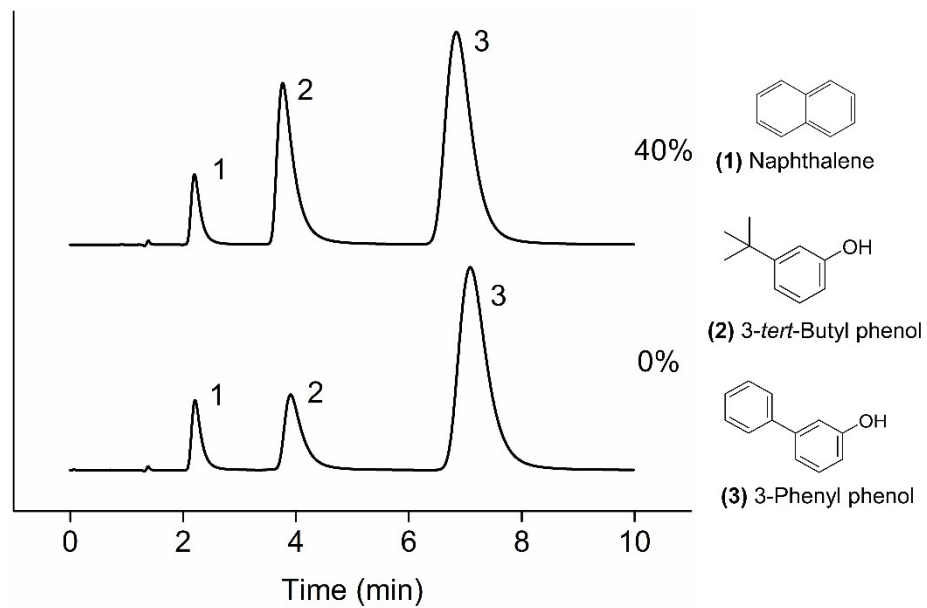

**Figure S-1.** Chromatograms of 0% and 40 % CO<sub>2</sub> saturated solvents for mixture of naphthalene, 3-*tert*-butylphenol, 3-phenylphenol. Conditions: Eprogen WCX CM-300 column; solvent A: 95% H<sub>2</sub>O/5% acetonitrile; solvent B: CO<sub>2</sub> saturated solvent A; isocratic; flow rate: 1 mL/min; UV 254 nm.

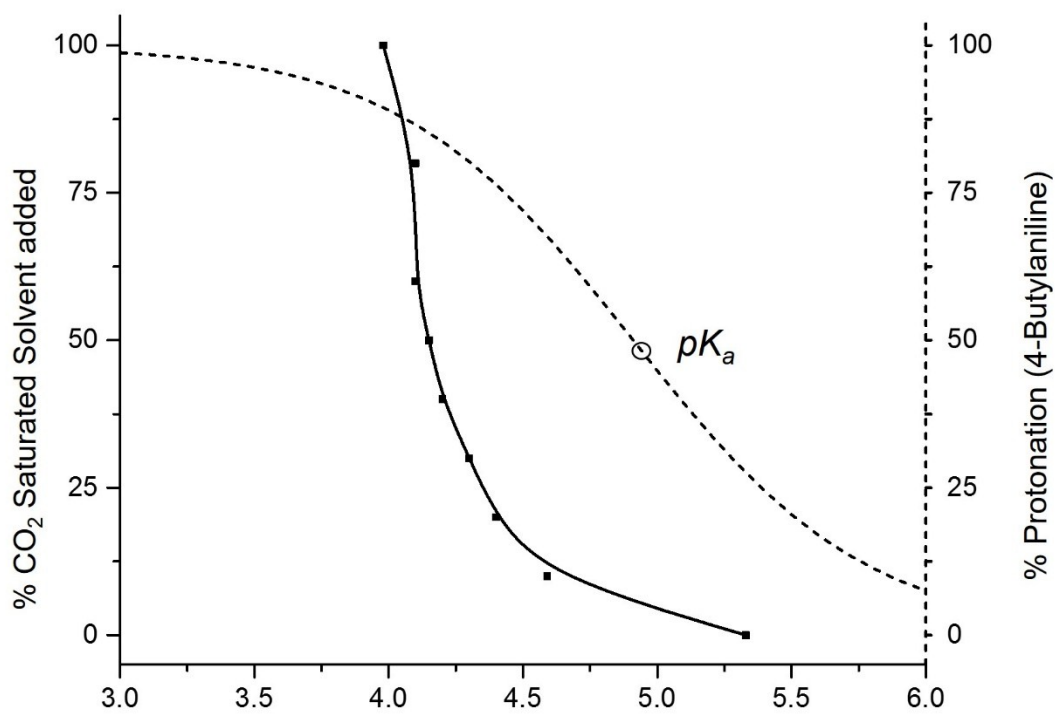

**Figure S-2.** Plot of pH vs percentage of CO<sub>2</sub> saturated water in HPLC as the mobile phase (solid line), percentage protonation of 4-butylaniline versus pH (dashed line).

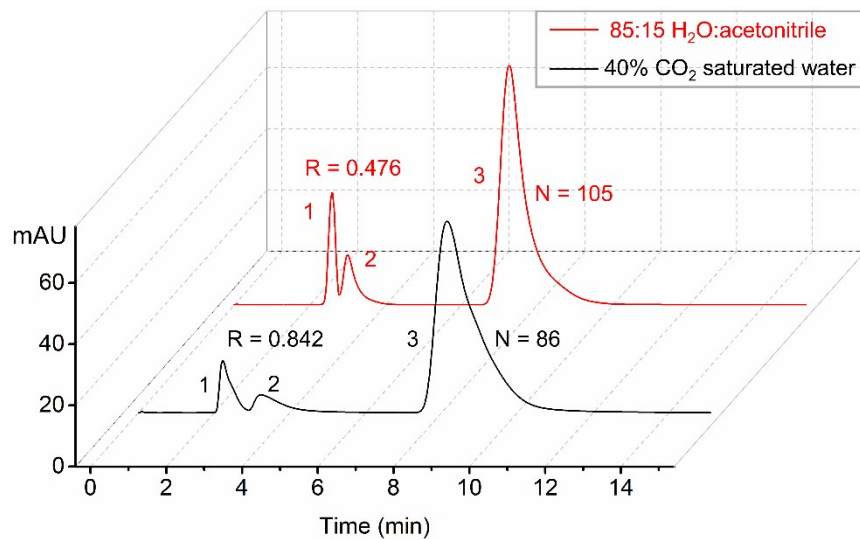

**Figure S-3:** Comparison of an acetonitrile/H<sub>2</sub>O and a CO<sub>2</sub>saturated water mobile phase based separation of using the PEI column.
